# Supplementary material
Source: Springer Nature journal article supplement (https://www.springermedizin.de/resource/supplementary/12889_2012_4797_MOESM1_ESM.pdf/9493234)

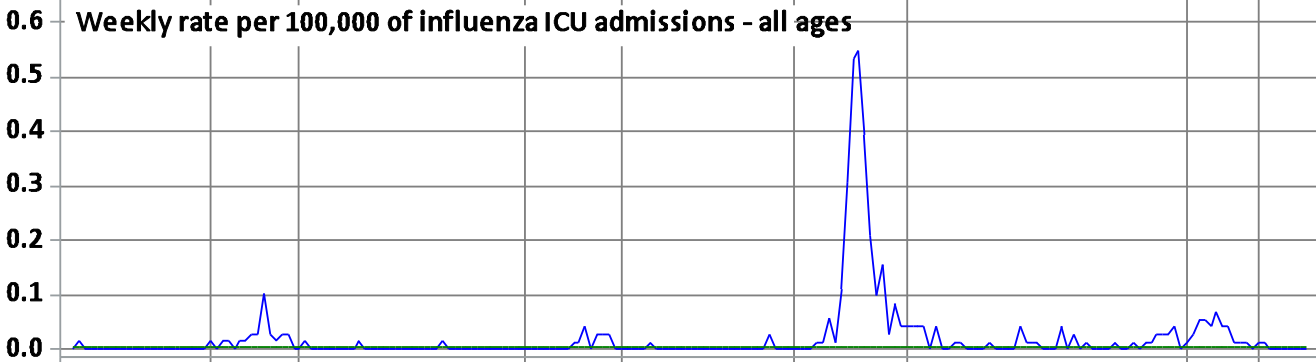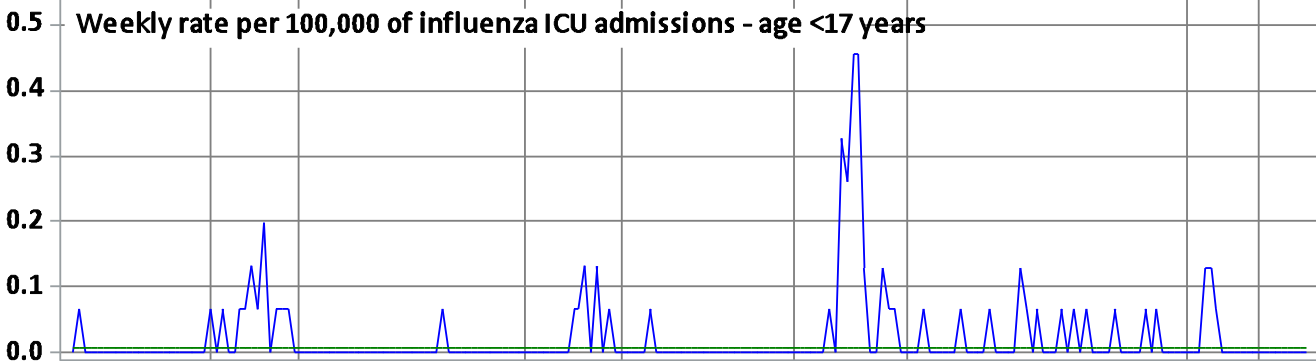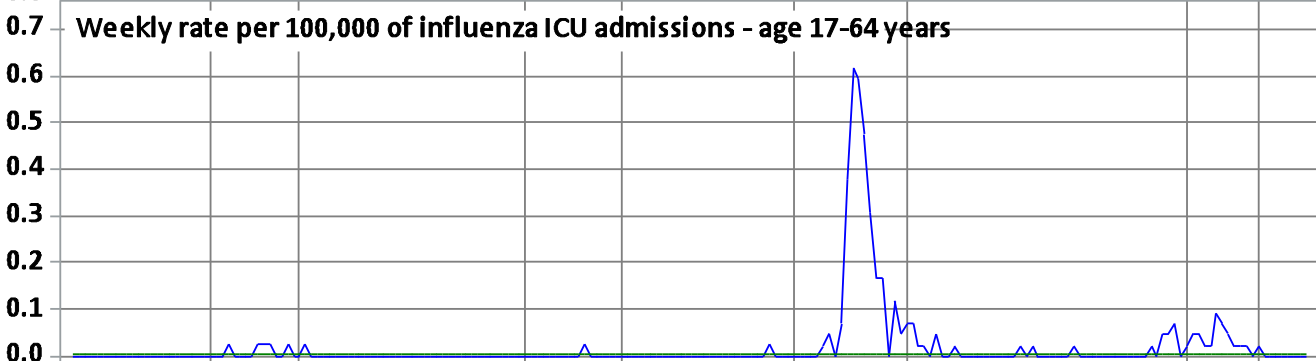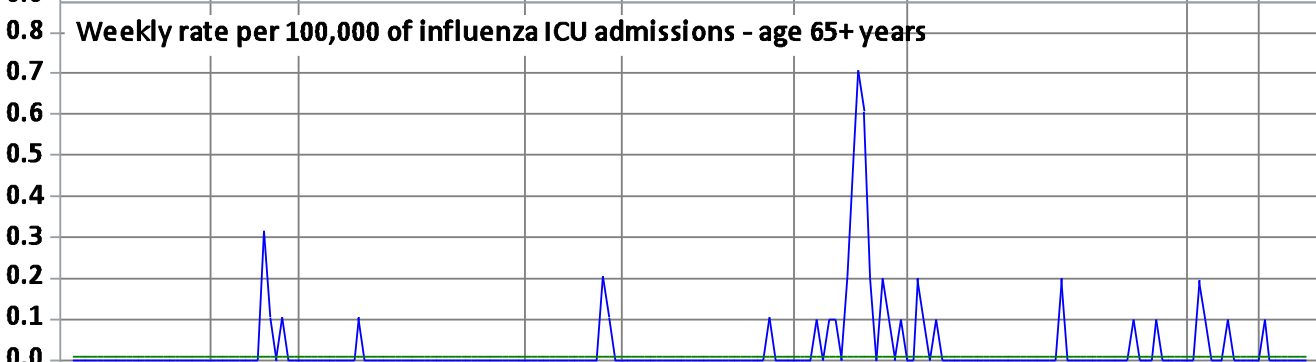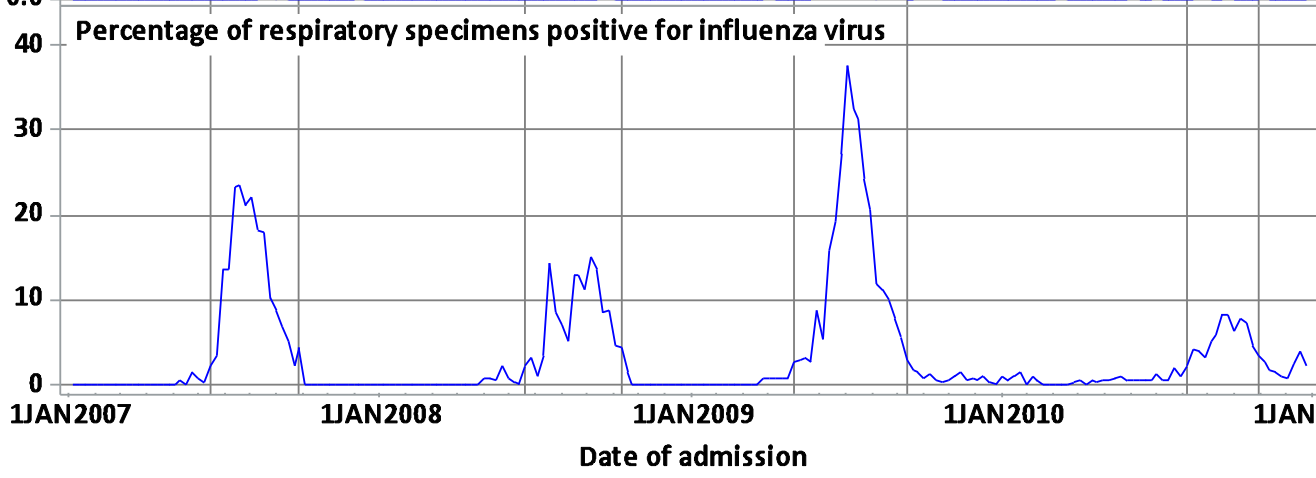

1JAN2007      1JAN2008      1JAN2009      1JAN2010      1JAN2011

**Date of admission**

Supplement: MOESM1 [file 9493234]
